# Supplementary material for: Structures and nonlinear optical properties of new symmetrical two-photon photopolymerization initiators
Source: Royal Society of Chemistry journal article supplement (doi:10.1039/b415354e), 2005-01-01
Supplement: b415354e.pdf [file b415354e.pdf]

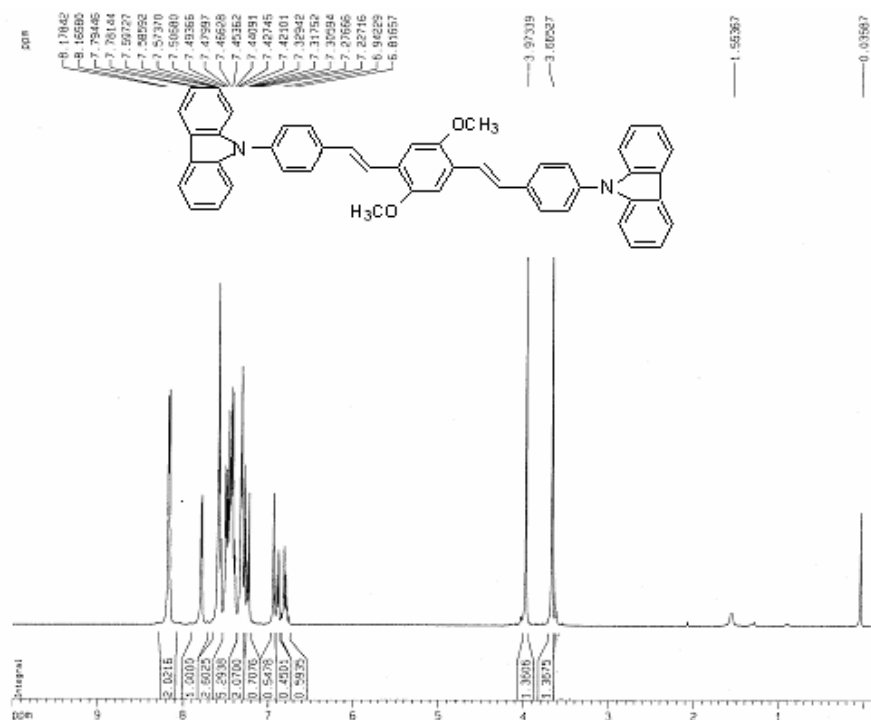

Fig. 1 The <sup>1</sup>H NMR (CDCl<sub>3</sub>, 600 MHz) of 1

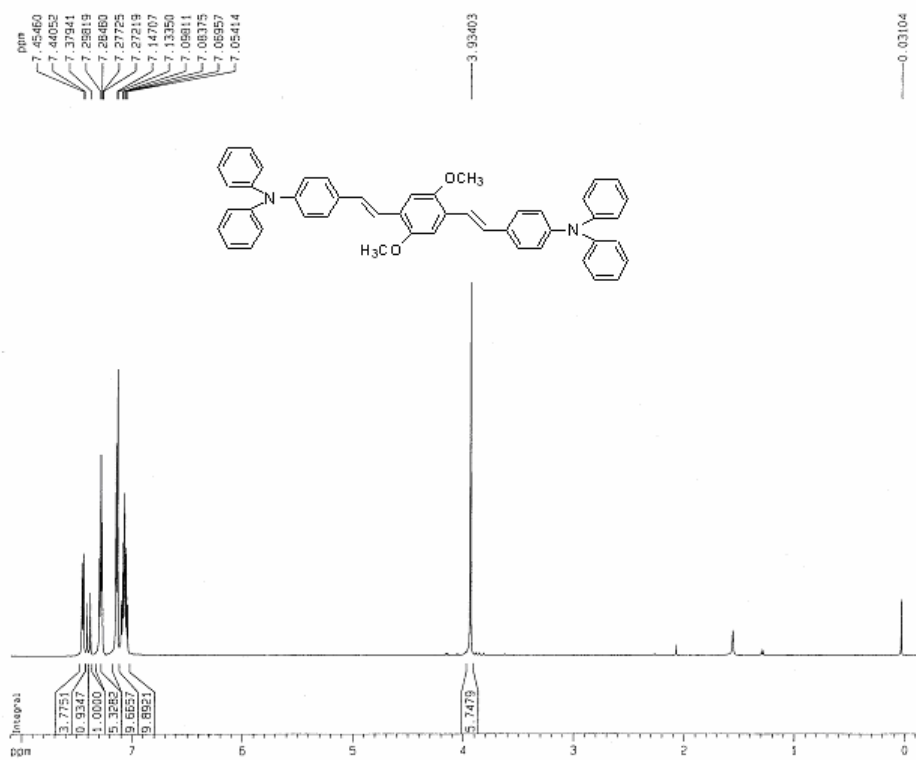

Fig. 2 The <sup>1</sup>H NMR (CDCl<sub>3</sub>, 600 MHz) of 2

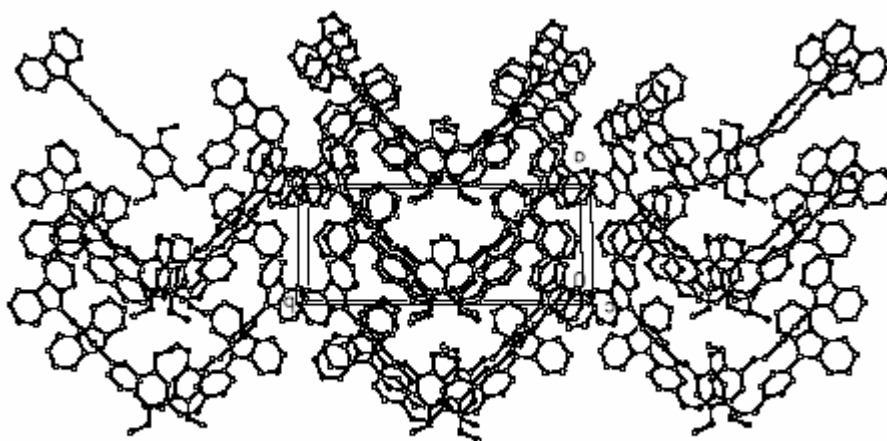

**Fig. 3** Packing drawing of **1**

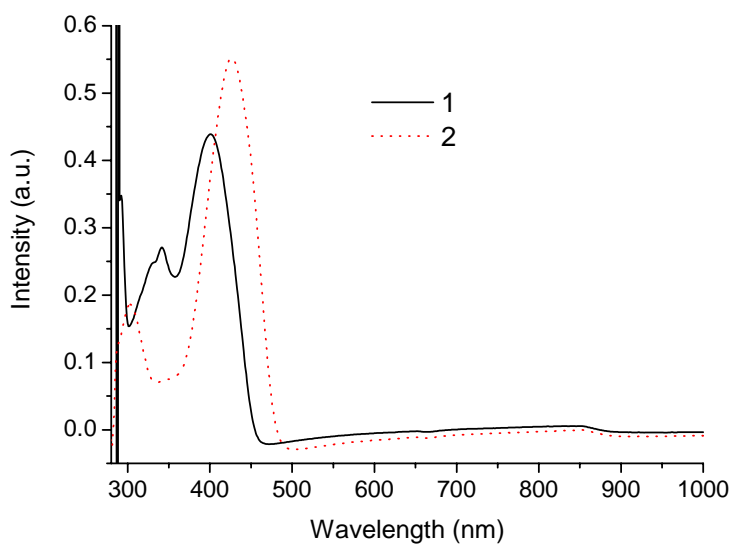

**Fig. 4** Linear absorption spectra of **1** and **2** in DMF with concentration of  $1 \times 10^{-5} \text{ mol L}^{-1}$ .

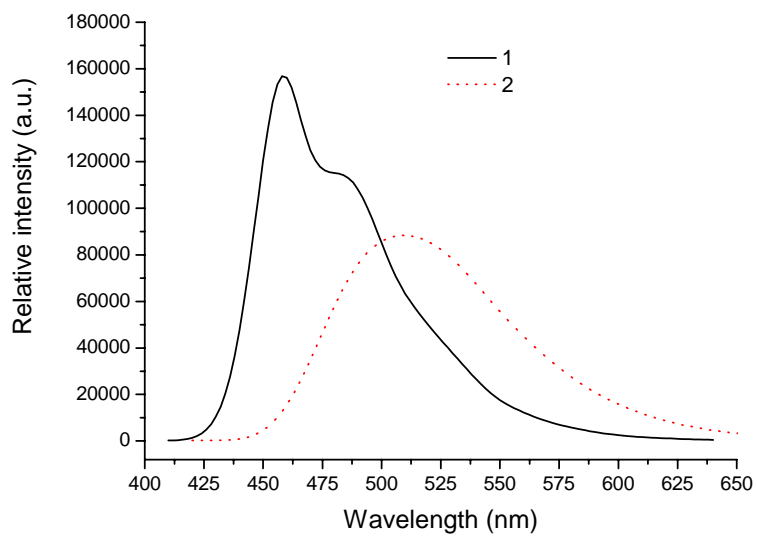

**Fig.5** One-photon fluorescence spectra of **1** and **2** in DMF with concentration of  $1 \times 10^{-5}$  mol L<sup>-1</sup>.

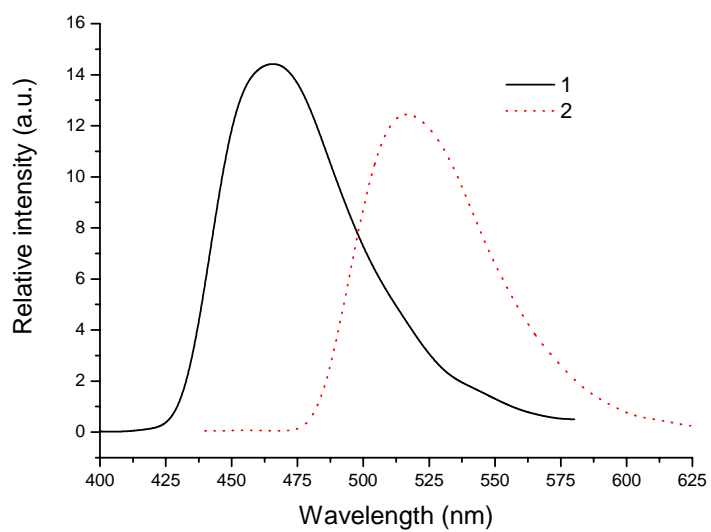

**Fig. 6** Two-photon fluorescence spectra of **1** and **2** in DMF with concentration of  $1 \times 10^{-3}$  mol L<sup>-1</sup>.

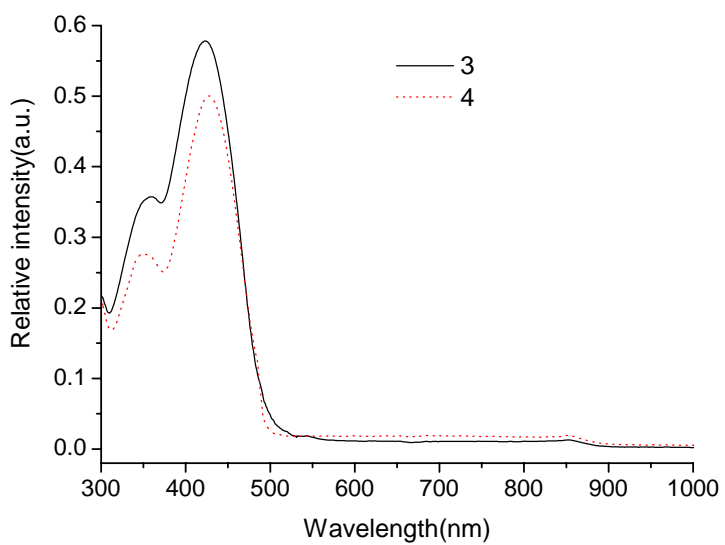

**Fig. 7** Linear absorption spectra of **3** and **4** in chloroform with concentration of  $1 \times 10^{-5}$  mol/L.

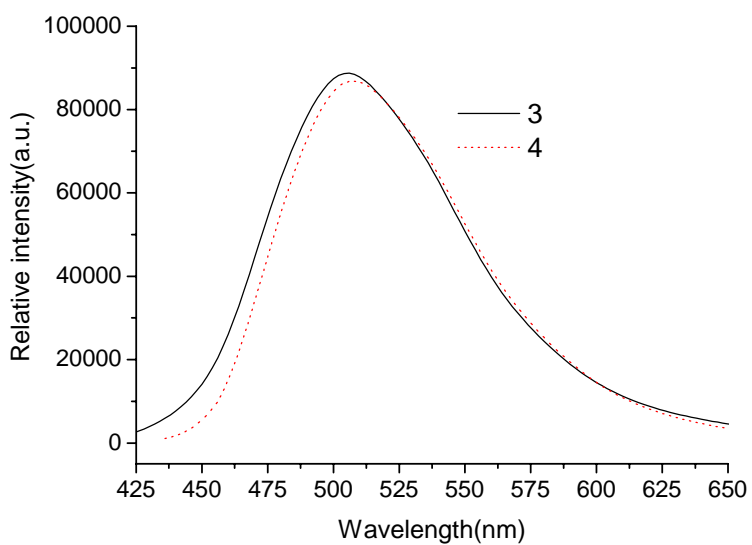

**Fig. 8** One-photon fluorescence spectra of **3** and **4** in chloroform with concentration of  $1 \times 10^{-5}$  mol/L.

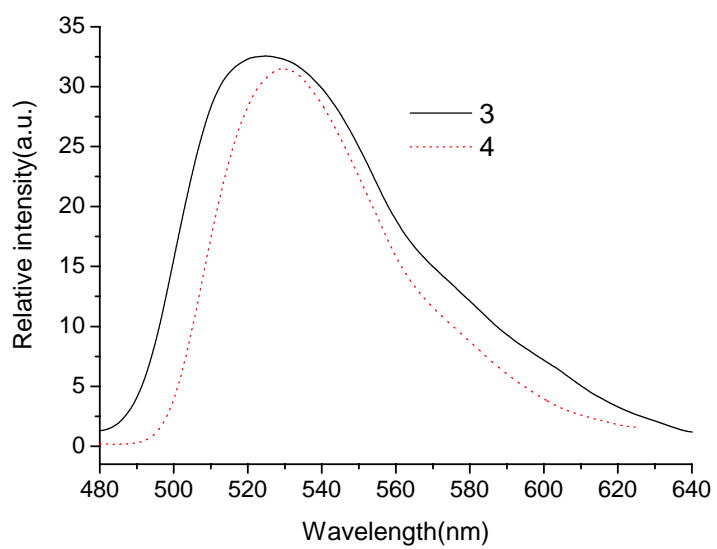

**Fig. 9** Two-photon fluorescence spectra of **3** and **4** in chloroform with concentration of  $1 \times 10^{-3}$  mol/L.
